# Supplementary material
Source: PubMed Central journal article supplement (PMC3358229)
Supplement: NIHMS235880-supplement-01.pdf [file NIHMS235880-supplement-01.pdf]

Table S1: Comparison by Regions

Table S1: Survey Data- Comparison by region

| Question                                                                                          | Categories              | Total<br>(N=175) | Comparison by Region* |                  |                            |                            |                 | p value |
|---------------------------------------------------------------------------------------------------|-------------------------|------------------|-----------------------|------------------|----------------------------|----------------------------|-----------------|---------|
|                                                                                                   |                         |                  | Aus/NZ<br>(N=13)      | Europe<br>(N=40) | Latin<br>America<br>(N=12) | North<br>America<br>(N=97) | Other<br>(N=13) |         |
| Did your center use low-dose acyclovir in allogeneic transplant recipients who were VZV+ or HSV+? | No                      | 33<br>(18.9%)    | 4<br>(30.8%)          | 11<br>(27.5%)    | 1<br>(8.3%)                | 11<br>(11.3%)              | 6<br>(46.2%)    | 0.006   |
|                                                                                                   | Yes                     | 142<br>(81.1%)   | 9<br>(69.2%)          | 29<br>(72.5%)    | 11<br>(91.7%)              | 86<br>(88.7%)              | 7<br>(53.8%)    |         |
| Indicate the low-dose acyclovir prophylactic treatment strategy used in VZV+ patients             | Do not Treat            | 34<br>(23.9%)    | 3<br>(33.3%)          | 3<br>(10.3%)     | 3 (27.3%)                  | 25<br>(29.1%)              | 0<br>(0.0%)     | 0.008   |
|                                                                                                   | Other duration          | 30<br>(21.1%)    | 1<br>(11.1%)          | 6<br>(20.7%)     | 0<br>(0.0%)                | 21<br>(24.4%)              | 2<br>(28.6%)    |         |
|                                                                                                   | Treat for 12 months     | 27<br>(19.0%)    | 1<br>(11.1%)          | 0<br>(0.0%)      | 2 (18.2%)                  | 24<br>(27.9%)              | 0<br>(0.0%)     |         |
|                                                                                                   | Treat for 3 to 4 months | 33<br>(23.2%)    | 2<br>(22.2%)          | 13<br>(44.8%)    | 3 (27.3%)                  | 11<br>(12.8%)              | 4<br>(57.1%)    |         |
|                                                                                                   | Treat until engraftment | 18<br>(12.7%)    | 2<br>(22.2%)          | 7<br>(24.1%)     | 3 (27.3%)                  | 5<br>(5.8%)                | 1<br>(14.3%)    |         |
| Indicate the low-dose acyclovir prophylactic treatment strategy used in HSV+ patients- (VZV -)    | Do not Treat            | 2<br>(1.4%)      | 0<br>(0.0%)           | 0<br>(0.0%)      | 1<br>(9.1%)                | 1<br>(1.2%)                | 0<br>(0.0%)     | 0.017** |
|                                                                                                   | Other duration          | 34<br>(23.9%)    | 1<br>(11.1%)          | 6<br>(20.7%)     | 0<br>(0.0%)                | 26<br>(30.2%)              | 1<br>(14.3%)    |         |
|                                                                                                   | Treat for 12 months     | 24<br>(16.9%)    | 1<br>(11.1%)          | 0<br>(.%)        | 2 (18.2%)                  | 21<br>(24.4%)              | 0<br>(.%)       |         |
|                                                                                                   | Treat for 3 to 4 months | 44<br>(31.0%)    | 3<br>(33.3%)          | 13<br>(44.8%)    | 4 (36.4%)                  | 20<br>(23.3%)              | 4<br>(57.1%)    |         |
|                                                                                                   | Treat until engraftment | 38<br>(26.8%)    | 4<br>(44.4%)          | 10<br>(34.5%)    | 4 (36.4%)                  | 18<br>(20.9%)              | 2<br>(28.6%)    |         |
| Did your center use prophylactic high-dose acyclovir in allogeneic                                | No                      | 120<br>(68.6%)   | 8<br>(61.5%)          | 21<br>(52.5%)    | 7 (58.3%)                  | 74<br>(76.3%)              | 10<br>(76.9%)   | 0.063   |

Table S1: Comparison by Regions

|                                                                                                               |                                                   |                |              |               |            |               |               |       |
|---------------------------------------------------------------------------------------------------------------|---------------------------------------------------|----------------|--------------|---------------|------------|---------------|---------------|-------|
| transplant recipients who were CMV+?                                                                          | Yes                                               | 55<br>(31.4%)  | 5<br>(38.5%) | 19<br>(47.5%) | 5 (41.7%)  | 23<br>(23.7%) | 3<br>(23.1%)  |       |
| Indicate the prophylactic high-dose acyclovir treatment strategy used in CMV + transplant recipients          | Other duration                                    | 10<br>(18.2%)  | 1<br>(20.0%) | 3<br>(15.8%)  | 0<br>(.%)  | 5 (22.7%)     | 1<br>(25.0%)  | 0.005 |
|                                                                                                               | Treat for 12 months                               | 7<br>(12.7%)   | 0<br>(.%)    | 0<br>(.%)     | 0<br>(.%)  | 6 (27.3%)     | 1<br>(25.0%)  |       |
|                                                                                                               | Treat for 3 to 4 months                           | 22<br>(40.0%)  | 4<br>(80.0%) | 11<br>(57.9%) | 4 (80.0%)  | 2<br>(9.1%)   | 1<br>(25.0%)  |       |
|                                                                                                               | Treat until engraftment                           | 16<br>(29.1%)  | 0<br>(.%)    | 5<br>(26.3%)  | 1 (20.0%)  | 9 (40.9%)     | 1<br>(25.0%)  |       |
| Did your center use a strategy of routine ganciclovir prophylaxis in some transplant recipients?              | No                                                | 126<br>(72.4%) | 6<br>(46.2%) | 30<br>(75.0%) | 8 (66.7%)  | 75<br>(78.1%) | 7<br>(53.8%)  | 0.069 |
|                                                                                                               | Yes                                               | 48<br>(27.6%)  | 7<br>(53.8%) | 10<br>(25.0%) | 4 (33.3%)  | 21<br>(21.9%) | 6<br>(46.2%)  |       |
| When was prophylaxis initiated?                                                                               | At time of engraftment                            | 26<br>(53.1%)  | 2<br>(28.6%) | 7<br>(70.0%)  | 2 (50.0%)  | 13<br>(61.9%) | 2<br>(28.6%)  | 0.446 |
|                                                                                                               | Other initiation schedule                         | 10<br>(20.4%)  | 2<br>(28.6%) | 1<br>(10.0%)  | 0<br>(.%)  | 4 (19.0%)     | 3<br>(42.9%)  |       |
|                                                                                                               | Pre-transplantation                               | 13<br>(26.5%)  | 3<br>(42.9%) | 2<br>(20.0%)  | 2 (50.0%)  | 4 (19.0%)     | 2<br>(28.6%)  |       |
| What was the duration of ganciclovir prophylaxis?                                                             | Greater than 3 months but less than or equal to 6 | 8<br>(16.3%)   | 1<br>(14.3%) | 1<br>(10.0%)  | 1 (25.0%)  | 4 (19.0%)     | 1<br>(14.3%)  | 0.735 |
|                                                                                                               | Less than or equal to 3 months                    | 36<br>(73.5%)  | 6<br>(85.7%) | 9<br>(90.0%)  | 3 (75.0%)  | 14<br>(66.7%) | 4<br>(57.1%)  |       |
|                                                                                                               | Other duration                                    | 5<br>(10.2%)   | 0<br>(.%)    | 0<br>(.%)     | 0<br>(.%)  | 3 (14.3%)     | 2<br>(28.6%)  |       |
| Did your center use a strategy of surveillance and preemptive therapy in at least some transplant recipients? | No                                                | 16<br>(9.2%)   | 4<br>(30.8%) | 2<br>(5.0%)   | 2 (16.7%)  | 5<br>(5.2%)   | 3<br>(23.1%)  | 0.007 |
|                                                                                                               | Yes                                               | 158<br>(90.8%) | 9<br>(69.2%) | 38<br>(95.0%) | 10 (83.3%) | 91<br>(94.8%) | 10<br>(76.9%) |       |

Table S1: Comparison by Regions

|                                                                                        |                                                     |                |              |               |             |               |              |       |
|----------------------------------------------------------------------------------------|-----------------------------------------------------|----------------|--------------|---------------|-------------|---------------|--------------|-------|
| Please indicate the primary means of surveillance used.                                | CMV antigenemia (pp65)                              | 72<br>(45.3%)  | 3<br>(33.3%) | 16<br>(42.1%) | 6 (60.0%)   | 40<br>(44.0%) | 7<br>(63.6%) | 0.725 |
|                                                                                        | Other method                                        | 7<br>(4.4%)    | 0<br>(.)     | 2<br>(5.3%)   | 0<br>(.)    | 4<br>(4.4%)   | 1<br>(9.1%)  |       |
|                                                                                        | Plasma CMV-DNA PCR                                  | 45<br>(28.3%)  | 3<br>(33.3%) | 8<br>(21.1%)  | 2 (20.0%)   | 30<br>(33.0%) | 2<br>(18.2%) |       |
|                                                                                        | Whole blood or leukocyte CMV-DNA PCR                | 35<br>(22.0%)  | 3<br>(33.3%) | 12<br>(31.6%) | 2 (20.0%)   | 17<br>(18.7%) | 1<br>(9.1%)  |       |
| Which transplant recipients underwent routine surveillance?                            | All recipients regardless of CMV serologic status   | 98<br>(61.6%)  | 5<br>(55.6%) | 31<br>(81.6%) | 9 (90.0%)   | 46<br>(50.5%) | 7<br>(63.6%) | <.001 |
|                                                                                        | CMV seropositive recipients (D+/R+ and D-/R+)       | 57<br>(35.8%)  | 4<br>(44.4%) | 5<br>(13.2%)  | 1 (10.0%)   | 44<br>(48.4%) | 3<br>(27.3%) |       |
|                                                                                        | Only CMV seropositive recipients (D+/R+ and D-/R+)  | 3<br>(1.9%)    | 0<br>(.)     | 2<br>(5.3%)   | 0<br>(0.0%) | 1<br>(1.1%)   | 0<br>(.)     |       |
|                                                                                        | Other surveillance strategy                         | 1<br>(0.6%)    | 0<br>(.)     | 0<br>(.)      | 0<br>(.)    | 0<br>(.)      | 1<br>(9.1%)  |       |
| How often were surveillance studies administered in the first 10 days post-transplant? | Other routine                                       | 8 (5.0%)       | 0<br>(.)     | 4<br>(10.5%)  | 0<br>(.)    | 2<br>(2.2%)   | 2<br>(18.2%) | 0.158 |
|                                                                                        | Twice per month                                     | 8 (5.0%)       | 0<br>(.)     | 1<br>(2.6%)   | 1 (10.0%)   | 5<br>(5.5%)   | 1<br>(9.1%)  |       |
|                                                                                        | Weekly or more frequently                           | 143<br>(89.9%) | 9<br>(100%)  | 33<br>(86.8%) | 9 (90.0%)   | 84<br>(92.3%) | 8<br>(72.7%) |       |
| If CMV was detected by surveillance, how long were patients usually treated?           | 2-3 weeks                                           | 14<br>(8.9%)   | 0<br>(.)     | 2<br>(5.3%)   | 1 (10.0%)   | 10<br>(11.0%) | 1<br>(10.0%) | 0.593 |
|                                                                                        | 2-3 weeks, or until clearance of CMV antigen or DNA | 90<br>(57.0%)  | 7<br>(77.8%) | 25<br>(65.8%) | 8 (80.0%)   | 44<br>(48.4%) | 6<br>(60.0%) |       |
|                                                                                        | Other length of treatment                           | 12<br>(7.6%)   | 0<br>(.)     | 1<br>(2.6%)   | 0<br>(.)    | 10<br>(11.0%) | 1<br>(10.0%) |       |
|                                                                                        | Until clearance of CMV antigen or DNA               | 25<br>(15.8%)  | 2<br>(22.2%) | 8<br>(21.1%)  | 0<br>(.)    | 13<br>(14.3%) | 2<br>(20.0%) |       |
|                                                                                        | Until day 100 after transplant                      | 17<br>(10.8%)  | 0<br>(.)     | 2<br>(5.3%)   | 1 (10.0%)   | 14<br>(15.4%) | 0<br>(.)     |       |

Table S1: Comparison by Regions

|                                                                                                               |                                                         |                |               |               |              |               |              |       |
|---------------------------------------------------------------------------------------------------------------|---------------------------------------------------------|----------------|---------------|---------------|--------------|---------------|--------------|-------|
| Did your center use a prophylactic or preemptive approach to CMV in high-risk transplant recipients after day | No                                                      | 52<br>(29.9%)  | 3<br>(23.1%)  | 8<br>(20.0%)  | 4 (33.3%)    | 31<br>(32.3%) | 6<br>(46.2%) | 0.385 |
|                                                                                                               | Yes                                                     | 122<br>(70.1%) | 10<br>(76.9%) | 32<br>(80.0%) | 8 (66.7%)    | 65<br>(67.7%) | 7<br>(53.8%) |       |
| Indicate the primary strategy used in high-risk recipients after day 100.                                     | Antiviral prophylaxis with high-dose valacyclovir       | 4<br>(3.3%)    | 1<br>(10.0%)  | 1<br>(3.1%)   | 0<br>(.%)    | 2<br>(3.1%)   | 0<br>(.%)    | 0.611 |
|                                                                                                               | Antiviral prophylaxis with oral valgancyclovir          | 2<br>(1.6%)    | 0<br>(.%)     | 0<br>(.%)     | 0<br>(.%)    | 1<br>(1.5%)   | 1<br>(14.3%) |       |
|                                                                                                               | Other strategy                                          | 6<br>(4.9%)    | 0<br>(.%)     | 0<br>(.%)     | 0<br>(.%)    | 6<br>(9.2%)   | 0<br>(.%)    |       |
|                                                                                                               | Treatment of disease                                    | 14<br>(11.5%)  | 1<br>(10.0%)  | 4<br>(12.5%)  | 0<br>(.%)    | 8 (12.3%)     | 1<br>(14.3%) |       |
|                                                                                                               | Virologic surveillance/<br>preemptive therapy           | 96<br>(78.7%)  | 8<br>(80.0%)  | 27<br>(84.4%) | 8<br>(100%)  | 48<br>(73.8%) | 5<br>(71.4%) |       |
| If surveillance was used after day 100, how often were surveillance tests administered?                       | Other routine                                           | 22<br>(18.8%)  | 1<br>(10.0%)  | 6<br>(18.8%)  | 0<br>(.%)    | 13<br>(21.3%) | 2<br>(33.3%) | 0.706 |
|                                                                                                               | Twice per month                                         | 61<br>(52.1%)  | 5<br>(50.0%)  | 17<br>(53.1%) | 5 (62.5%)    | 30<br>(49.2%) | 4<br>(66.7%) |       |
|                                                                                                               | Weekly or more frequently                               | 34<br>(29.1%)  | 4<br>(40.0%)  | 9<br>(28.1%)  | 3 (37.5%)    | 18<br>(29.5%) | 0<br>(.%)    |       |
| Did your center have a strategy for using CMV seronegative blood products and/or leukoreduction in allogeneic | No                                                      | 12<br>(6.9%)   | 0<br>(.%)     | 2<br>(5.0%)   | 0<br>(.%)    | 6<br>(6.3%)   | 4<br>(30.8%) | 0.045 |
|                                                                                                               | Yes                                                     | 162<br>(93.1%) | 13<br>(100%)  | 38<br>(95.0%) | 12<br>(100%) | 90<br>(93.8%) | 9<br>(69.2%) |       |
| Indicate your center's primary strategy.                                                                      | Both CMV seronegative blood products and leukoreduction | 60<br>(37.0%)  | 2<br>(15.4%)  | 16<br>(42.1%) | 2 (16.7%)    | 38<br>(42.2%) | 2<br>(22.2%) | 0.097 |
|                                                                                                               | CMV seronegative blood products ONLY                    | 10<br>(6.2%)   | 3<br>(23.1%)  | 1<br>(2.6%)   | 0<br>(.%)    | 6<br>(6.7%)   | 0<br>(.%)    |       |
|                                                                                                               | Either, CMV seronegative blood products preferred       | 34<br>(21.0%)  | 7<br>(53.8%)  | 5<br>(13.2%)  | 1<br>(8.3%)  | 18<br>(20.0%) | 3<br>(33.3%) |       |
|                                                                                                               | Either, no preference                                   | 4 (2.5%)       | 0<br>(.%)     | 0<br>(.%)     | 1<br>(8.3%)  | 3<br>(3.3%)   | 0<br>(.%)    |       |

Table S1: Comparison by Regions

|                                                                                          |                                          |                |              |               |              |               |               |       |
|------------------------------------------------------------------------------------------|------------------------------------------|----------------|--------------|---------------|--------------|---------------|---------------|-------|
|                                                                                          | Leukoreduction ONLY                      | 48<br>(29.6%)  | 1<br>(7.7%)  | 14<br>(36.8%) | 8 (66.7%)    | 22<br>(24.4%) | 3<br>(33.3%)  |       |
|                                                                                          | Other Strategy                           | 6<br>(3.7%)    | 0<br>(.)     | 2<br>(5.3%)   | 0<br>(.)     | 3<br>(3.3%)   | 1<br>(11.1%)  |       |
| Indicate which patients received CMV-seronegative blood products and/or leukoreductions. | All patients                             | 76<br>(46.9%)  | 3<br>(23.1%) | 21<br>(55.3%) | 7 (58.3%)    | 40<br>(44.4%) | 5<br>(55.6%)  | 0.071 |
|                                                                                          | Only CMV D-/R-                           | 39<br>(24.1%)  | 5<br>(38.5%) | 12<br>(31.6%) | 1<br>(8.3%)  | 18<br>(20.0%) | 3<br>(33.3%)  |       |
|                                                                                          | Other patient groups                     | 6<br>(3.7%)    | 0<br>(.)     | 1<br>(2.6%)   | 0<br>(.)     | 4<br>(4.4%)   | 1<br>(11.1%)  |       |
|                                                                                          | CMV D-/R- and D+/R-                      | 41<br>(25.3%)  | 5<br>(38.5%) | 4<br>(10.5%)  | 4 (33.3%)    | 28<br>(31.1%) | 0<br>(.)      |       |
| Did your center ever use adoptive immunotherapy in allogeneic transplant recipients?     | No                                       | 167<br>(96.0%) | 13<br>(100%) | 38<br>(95.0%) | 12<br>(100%) | 92<br>(95.8%) | 12<br>(92.3%) | 0.9   |
|                                                                                          | Yes                                      | 7<br>(4.0%)    | 0<br>(.)     | 2<br>(5.0%)   | 0<br>(.)     | 4<br>(4.2%)   | 1<br>(7.7%)   |       |
| Indicate your center's primary strategy for using adoptive immunotherapy.                | Only after failure of preemptive therapy | 4<br>(57.1%)   | 0<br>(.)     | 1<br>(50.0%)  | 0<br>(.)     | 2 (50.0%)     | 1<br>(100%)   | 1     |
|                                                                                          | Used as preemptive therapy               | 2<br>(28.6%)   | 0<br>(.)     | 1<br>(50.0%)  | 0<br>(.)     | 1 (25.0%)     | 0<br>(.)      |       |
|                                                                                          | Used as prophylaxis                      | 1<br>(14.3%)   | 0<br>(.)     | 0<br>(.)      | 0<br>(.)     | 1 (25.0%)     | 0<br>(.)      |       |
| Did your center use systemic antifungal prophylaxis in allogeneic transplant recipients? | No                                       | 19<br>(10.9%)  | 0<br>(.)     | 9<br>(22.5%)  | 0<br>(.)     | 6<br>(6.3%)   | 4<br>(30.8%)  | 0.005 |
|                                                                                          | Yes                                      | 155<br>(89.1%) | 13<br>(100%) | 31<br>(77.5%) | 12<br>(100%) | 90<br>(93.8%) | 9<br>(69.2%)  |       |
| Indicate when your center initiated antifungal prophylaxis.                              | With conditioning regimen                | 97<br>(62.6%)  | 9<br>(69.2%) | 25<br>(80.7%) | 9 (75.0%)    | 49<br>(54.4%) | 5<br>(55.6%)  | 0.007 |
|                                                                                          | At infusion of graft (Day 0 +/- 1 day)   | 42<br>(27.1%)  | 4<br>(30.8%) | 1<br>(3.2%)   | 2 (16.7%)    | 33<br>(36.7%) | 2<br>(22.2%)  |       |

Table S1: Comparison by Regions

|                                                                                    |                         |                |               |               |              |               |              |       |
|------------------------------------------------------------------------------------|-------------------------|----------------|---------------|---------------|--------------|---------------|--------------|-------|
|                                                                                    | Other                   | 16<br>(10.3%)  | 0<br>(.%)     | 5<br>(16.1%)  | 1<br>(8.3%)  | 8<br>(8.9%)   | 2<br>(22.2%) |       |
|                                                                                    |                         |                |               |               |              |               |              |       |
| Indicate the duration of antifungal prophylaxis used by your center.               | Treat until engraftment | 35<br>(22.7%)  | 3<br>(23.1%)  | 8<br>(25.8%)  | 3 (25.0%)    | 15<br>(16.9%) | 6<br>(66.7%) | 0.116 |
|                                                                                    | Treat until day 75-100  | 74<br>(48.1%)  | 8<br>(61.5%)  | 16<br>(51.6%) | 6 (75.0%)    | 42<br>(47.2%) | 2<br>(22.2%) |       |
|                                                                                    | Other                   | 45<br>(29.2%)  | 2<br>(15.3%)  | 7<br>(22.6%)  | 3 (25.0%)    | 32<br>(36.0%) | 1<br>(11.1%) |       |
|                                                                                    |                         |                |               |               |              |               |              |       |
| Indicate the primary drug used for systemic antifungal prophylaxis at your center. | Fluconazole             | 124<br>(80.5%) | 11<br>(84.6%) | 21<br>(67.7%) | 12<br>(100%) | 73<br>(82.2%) | 7<br>(77.8%) | 0.098 |
|                                                                                    | Itraconazole            | 18<br>(11.69%) | 1<br>(7.7%)   | 9<br>(29.3%)  | 0<br>(.%)    | 7<br>(7.9%)   | 1<br>(11.1%) |       |
|                                                                                    | Other                   | 12<br>(7.8%)   | 1<br>(7.7%)   | 1<br>(3.2%)   | 0<br>(.%)    | 9 (10.1%)     | 1<br>(11.1%) |       |

\* Countries represented by region (number of responding programs): US/Can--United States (90), Canada (7); Europe-- Germany (13)United Kingdom (7), Spain (5), Belgium (3), Sweden (2), Finland (2), Italy (2), Switzerland (1), Norway (1), Denmark (1), Poland (1), Portugal (1), Czech Republic (1); Australia/NZ-- Australia (10), New Zealand (3); Latin America-- Brazil (3), Argentina (3), Uruguay (3), Venezuela (2), Mexico (1); Middle East-- Israel (2), Iran (1), Pakistan (1); Asia-- India (2), China, Hong Kong (1), Japan (1), Taiwan (1), Korea (1); Africa-- South Africa (3)

\*\*P value for comparison only between those regions that treated until engraftment, 3-4 months, and 12 months only.

Table S2: Survey data- Comparison by patient population and center size

| Question                                                                                          | Categories              | Patient Population                          |                               |                                   |         | Center Size                        |                                   |         |
|---------------------------------------------------------------------------------------------------|-------------------------|---------------------------------------------|-------------------------------|-----------------------------------|---------|------------------------------------|-----------------------------------|---------|
|                                                                                                   |                         | Both adult and pediatric patients<br>(N=57) | Adult patients only<br>(N=81) | Pediatric patients only<br>(N=37) | p value | ≤ 50 annual transplants<br>(N=108) | > 50 annual transplants<br>(N=56) | p value |
| Did your center use low-dose acyclovir in allogeneic transplant recipients who were VZV+ or HSV+? | No                      | 11<br>(19.3%)                               | 15<br>(18.5%)                 | 7<br>(18.9%)                      | 1       | 16<br>(14.8%)                      | 14<br>(25.0%)                     | 0.11    |
|                                                                                                   | Yes                     | 46<br>(80.7%)                               | 66<br>(81.5%)                 | 30<br>(81.1%)                     |         | 92<br>(85.2%)                      | 42<br>(75.0%)                     |         |
| Indicate the low-dose acyclovir prophylactic treatment strategy used in VZV+ patients             | Do not Treat            | 14<br>(30.4%)                               | 12<br>(18.2%)                 | 8<br>(26.7%)                      | 0.727   | 25<br>(27.2%)                      | 7<br>(16.7%)                      | 0.534   |
|                                                                                                   | Other duration          | 7<br>(15.2%)                                | 17<br>(25.8%)                 | 6<br>(20.0%)                      |         | 16<br>(17.4%)                      | 10<br>(23.8%)                     |         |
|                                                                                                   | Treat for 12 months     | 8<br>(17.4%)                                | 14<br>(21.2%)                 | 5<br>(16.7%)                      |         | 19<br>(20.7%)                      | 8<br>(19.0%)                      |         |
|                                                                                                   | Treat for 3 to 4 months | 13<br>(28.3%)                               | 13<br>(19.7%)                 | 7<br>(23.3%)                      |         | 23<br>(25.0%)                      | 10<br>(23.8%)                     |         |
|                                                                                                   | Treat until engraftment | 4<br>(8.7%)                                 | 10<br>(15.2%)                 | 4<br>(13.3%)                      |         | 9<br>(9.8%)                        | 7<br>(16.7%)                      |         |
| Indicate the low-dose acyclovir prophylactic treatment strategy used in HSV+ patients- (VZV -)    | Do not Treat            | 0<br>(.%)                                   | 1<br>(1.5%)                   | 1<br>(3.3%)                       | 0.839   | 2<br>(2.2%)                        | 0<br>(.%)                         | 0.688   |
|                                                                                                   | Other duration          | 10<br>(21.7%)                               | 17<br>(25.8%)                 | 7<br>(23.3%)                      |         | 20<br>(21.7%)                      | 10<br>(23.8%)                     |         |
|                                                                                                   | Treat for 12 months     | 7<br>(15.2%)                                | 14<br>(21.2%)                 | 3<br>(10.0%)                      |         | 16<br>(17.4%)                      | 7<br>(16.7%)                      |         |
|                                                                                                   | Treat for 3 to 4 months | 15<br>(32.6%)                               | 18<br>(27.3%)                 | 11<br>(36.7%)                     |         | 32<br>(34.8%)                      | 11<br>(26.2%)                     |         |

Table S2: Comparisons by Patient Population and Center Size

|                                                                                                         |                                                   |               |               |               |       |               |               |       |
|---------------------------------------------------------------------------------------------------------|---------------------------------------------------|---------------|---------------|---------------|-------|---------------|---------------|-------|
|                                                                                                         | Treat until engraftment                           | 14<br>(30.4%) | 16<br>(24.2%) | 8<br>(26.7%)  |       | 22<br>(23.9%) | 14<br>(33.3%) |       |
| Did your center use prophylactic high-dose acyclovir in allogeneic transplant recipients who were CMV+? | No                                                | 40<br>(70.2%) | 63<br>(77.8%) | 17<br>(45.9%) | 0.002 | 73<br>(67.6%) | 38<br>(67.9%) | 0.973 |
|                                                                                                         | Yes                                               | 17<br>(29.8%) | 18<br>(22.2%) | 20<br>(54.1%) |       | 35<br>(32.4%) | 18<br>(32.1%) |       |
| Indicate the prophylactic high-dose acyclovir treatment strategy used in CMV + transplant recipients    | Other duration                                    | 2<br>(11.1%)  | 4<br>(23.5%)  | 4<br>(20.0%)  | 0.746 | 6<br>(16.7%)  | 4<br>(22.2%)  | 0.098 |
|                                                                                                         | Treat for 12 months                               | 2<br>(11.1%)  | 2<br>(11.8%)  | 3<br>(15.0%)  |       | 2<br>(5.6%)   | 5<br>(27.8%)  |       |
|                                                                                                         | Treat for 3 to 4 months                           | 6<br>(33.3%)  | 8<br>(47.1%)  | 8<br>(40.0%)  |       | 15<br>(41.7%) | 6<br>(33.3%)  |       |
|                                                                                                         | Treat until engraftment                           | 8<br>(44.4%)  | 3<br>(17.6%)  | 5<br>(25.0%)  |       | 13<br>(36.1%) | 3<br>(16.7%)  |       |
| Did your center use a strategy of routine ganciclovir prophylaxis in some transplant recipients?        | No                                                | 39<br>(68.4%) | 57<br>(71.3%) | 30<br>(81.1%) | 0.393 | 81<br>(75.0%) | 39<br>(69.6%) | 0.463 |
|                                                                                                         | Yes                                               | 18<br>(31.6%) | 23<br>(28.8%) | 7<br>(18.9%)  |       | 27<br>(25.0%) | 17<br>(30.4%) |       |
| When was prophylaxis initiated?                                                                         | At time of engraftment                            | 11<br>(57.9%) | 12<br>(52.2%) | 3<br>(42.9%)  | 0.854 | 15<br>(53.6%) | 9<br>(52.9%)  | 0.921 |
|                                                                                                         | Other initiation schedule                         | 4<br>(21.1%)  | 5<br>(21.7%)  | 1<br>(14.3%)  |       | 5<br>(17.9%)  | 4<br>(23.5%)  |       |
|                                                                                                         | Pre-transplantation                               | 4<br>(21.1%)  | 6<br>(26.1%)  | 3<br>(42.9%)  |       | 8<br>(28.6%)  | 4<br>(23.5%)  |       |
| What was the duration of ganciclovir prophylaxis?                                                       | Greater than 3 months but less than or equal to 6 | 3<br>(15.8%)  | 4<br>(17.4%)  | 1<br>(14.3%)  | 0.758 | 6<br>(21.4%)  | 2<br>(11.8%)  | 0.885 |
|                                                                                                         | Less than or equal to 3 months                    | 13<br>(68.4%) | 18<br>(78.3%) | 5<br>(71.4%)  |       | 19<br>(67.9%) | 13<br>(76.5%) |       |
|                                                                                                         | Other duration                                    | 3<br>(15.8%)  | 1<br>(4.3%)   | 1<br>(14.3%)  |       | 3<br>(10.7%)  | 2<br>(11.8%)  |       |



Table S2: Comparisons by Patient Population and Center Size

|                                                                                                               |                                                     |               |               |               |       |               |               |       |
|---------------------------------------------------------------------------------------------------------------|-----------------------------------------------------|---------------|---------------|---------------|-------|---------------|---------------|-------|
| Did your center use a strategy of surveillance and preemptive therapy in at least some transplant recipients? | No                                                  | 5<br>(8.8%)   | 7<br>(8.8%)   | 4<br>(10.8%)  | 0.889 | 12<br>(11.1%) | 3<br>(5.4%)   | 0.268 |
|                                                                                                               | Yes                                                 | 52<br>(91.2%) | 73<br>(91.3%) | 33<br>(89.2%) |       | 96<br>(88.9%) | 53<br>(94.6%) |       |
| Please indicate the primary means of surveillance used.                                                       | CMV antigenemia (pp65)                              | 27<br>(50.9%) | 30<br>(41.1%) | 15<br>(45.5%) | 0.544 | 44<br>(45.4%) | 23<br>(43.4%) | 0.97  |
|                                                                                                               | Other method                                        | 2 (3.8%)      | 4 (5.5%)      | 1 (3.0%)      |       | 4 (4.1%)      | 3 (5.7%)      |       |
|                                                                                                               | Plasma CMV-DNA PCR                                  | 12<br>(22.6%) | 20<br>(27.4%) | 13<br>(39.4%) |       | 27<br>(27.8%) | 15<br>(28.3%) |       |
|                                                                                                               | Whole blood or leukocyte CMV-DNA PCR                | 12<br>(22.6%) | 19<br>(26.0%) | 4<br>(12.1%)  |       | 22<br>(22.7%) | 12<br>(22.6%) |       |
| Which transplant recipients underwent routine surveillance?                                                   | All recipients regardless of CMV serologic status   | 34<br>(64.2%) | 41<br>(56.2%) | 23<br>(69.7%) | 0.649 | 56<br>(57.7%) | 38<br>(71.7%) | 0.104 |
|                                                                                                               | CMV seropositive recipients (D+/R+ and D-/R+)       | 17<br>(32.1%) | 30<br>(41.1%) | 10<br>(30.3%) |       | 39<br>(40.2%) | 13<br>(24.5%) |       |
|                                                                                                               | Only CMV seropositive recipients (D+/R+ and D-/R+)  | 1<br>(1.9%)   | 2<br>(2.7%)   | 0<br>(.%)     |       | 1<br>(1.0%)   | 2<br>(3.8%)   |       |
|                                                                                                               | Other surveillance strategy                         | 1<br>(1.9%)   | 0<br>(0.0%)   | 0<br>(.%)     |       | 1<br>(1.0%)   | 0<br>(.%)     |       |
| How often were surveillance studies administered in the first 10 days post-transplant?                        | Other routine                                       | 2<br>(3.8%)   | 4<br>(5.5%)   | 2<br>(6.1%)   | 0.945 | 5<br>(5.2%)   | 2<br>(3.8%)   | 0.834 |
|                                                                                                               | Twice per month                                     | 3<br>(5.7%)   | 3<br>(4.1%)   | 2<br>(6.1%)   |       | 6<br>(6.2%)   | 2<br>(3.8%)   |       |
|                                                                                                               | Weekly or more frequently                           | 48<br>(90.6%) | 66<br>(90.4%) | 29<br>(87.9%) |       | 86<br>(88.7%) | 49<br>(92.5%) |       |
| If CMV was detected by surveillance, how long were patients usually treated?                                  | 2-3 weeks                                           | 4<br>(7.7%)   | 8<br>(11.0%)  | 2<br>(6.1%)   | 0.84  | 5<br>(5.2%)   | 9<br>(17.0%)  | 0.117 |
|                                                                                                               | 2-3 weeks, or until clearance of CMV antigen or DNA | 26<br>(50.0%) | 45<br>(61.6%) | 19<br>(57.6%) |       | 59<br>(61.5%) | 25<br>(47.2%) |       |
|                                                                                                               | Other length of treatment                           | 6<br>(11.5%)  | 4<br>(5.5%)   | 2<br>(6.1%)   |       | 6<br>(6.3%)   | 6<br>(11.3%)  |       |

Table S2: Comparisons by Patient Population and Center Size

|                                                                                                               |                                                         |               |               |               |       |                |               |       |
|---------------------------------------------------------------------------------------------------------------|---------------------------------------------------------|---------------|---------------|---------------|-------|----------------|---------------|-------|
|                                                                                                               | Until clearance of CMV antigen or DNA                   | 10<br>(19.2%) | 9<br>(12.3%)  | 6<br>(18.2%)  |       | 15<br>(15.6%)  | 8<br>(15.1%)  |       |
|                                                                                                               | Until day 100 after transplant                          | 6<br>(11.5%)  | 7<br>(9.6%)   | 4<br>(12.1%)  |       | 11<br>(11.5%)  | 5<br>(9.4%)   |       |
|                                                                                                               |                                                         |               |               |               |       |                |               |       |
| Did your center use a prophylactic or preemptive approach to CMV in high-risk transplant recipients after day | No                                                      | 22<br>(38.6%) | 19<br>(23.8%) | 11<br>(29.7%) | 0.174 | 30<br>(27.8%)  | 17<br>(30.4%) | 0.729 |
|                                                                                                               | Yes                                                     | 35<br>(61.4%) | 61<br>(76.3%) | 26<br>(70.3%) |       | 78<br>(72.2%)  | 39<br>(69.6%) |       |
|                                                                                                               |                                                         |               |               |               |       |                |               |       |
| Indicate the primary strategy used in high-risk recipients after day 100.                                     | Antiviral prophylaxis with high-dose valgancyclovir     | 1<br>(2.9%)   | 3<br>(4.9%)   | 0<br>(.%)     | 0.921 | 3<br>(3.8%)    | 1<br>(2.6%)   | 0.07  |
|                                                                                                               | Antiviral prophylaxis with oral valgancyclovir          | 0<br>(.%)     | 1<br>(1.6%)   | 1<br>(3.8%)   |       | 2<br>(2.6%)    | 0<br>(.%)     |       |
|                                                                                                               | Other strategy                                          | 1<br>(2.9%)   | 4<br>(6.6%)   | 1<br>(3.8%)   |       | 2<br>(2.6%)    | 3<br>(7.7%)   |       |
|                                                                                                               | Treatment of disease                                    | 3<br>(8.6%)   | 8<br>(13.1%)  | 3<br>(11.5%)  |       | 13<br>(16.7%)  | 1<br>(2.6%)   |       |
|                                                                                                               | Virologic surveillance/preemptive therapy               | 30<br>(85.7%) | 45<br>(73.8%) | 21<br>(80.8%) |       | 58<br>(74.4%)  | 34<br>(87.2%) |       |
|                                                                                                               |                                                         |               |               |               |       |                |               |       |
| If surveillance was used after day 100, how often were surveillance tests administered?                       | Other routine                                           | 5<br>(14.7%)  | 13<br>(22.0%) | 4<br>(16.7%)  | 0.539 | 15<br>(20.3%)  | 7<br>(18.4%)  | 0.897 |
|                                                                                                               | Twice per month                                         | 17<br>(50.0%) | 33<br>(55.9%) | 11<br>(45.8%) |       | 37<br>(50.0%)  | 21<br>(55.3%) |       |
|                                                                                                               | Weekly or more frequently                               | 12<br>(35.3%) | 13<br>(22.0%) | 9<br>(37.5%)  |       | 22<br>(29.7%)  | 10<br>(26.3%) |       |
|                                                                                                               |                                                         |               |               |               |       |                |               |       |
| Did your center have a strategy for using CMV seronegative blood products and/or leukoreduction in allogeneic | No                                                      | 8<br>(14.0%)  | 2<br>(2.5%)   | 2<br>(5.4%)   | 0.035 | 7<br>(6.5%)    | 5<br>(8.9%)   | 0.546 |
|                                                                                                               | Yes                                                     | 49<br>(86.0%) | 78<br>(97.5%) | 35<br>(94.6%) |       | 101<br>(93.5%) | 51<br>(91.1%) |       |
|                                                                                                               |                                                         |               |               |               |       |                |               |       |
| Indicate your center's primary strategy.                                                                      | Both CMV seronegative blood products and leukoreduction | 14<br>(28.6%) | 36<br>(46.2%) | 10<br>(28.6%) | 0.016 | 35<br>(34.7%)  | 22<br>(43.1%) | 0.659 |

Table S2: Comparisons by Patient Population and Center Size

|                                                                                          |                                                   |               |               |               |       |                |               |       |
|------------------------------------------------------------------------------------------|---------------------------------------------------|---------------|---------------|---------------|-------|----------------|---------------|-------|
|                                                                                          | CMV seronegative blood products ONLY              | 0<br>(.%)     | 7<br>(9.0%)   | 3<br>(8.6%)   |       | 7<br>(6.9%)    | 2<br>(3.9%)   |       |
|                                                                                          | Either, CMV seronegative blood products preferred | 13<br>(26.5%) | 13<br>(16.7%) | 8<br>(22.9%)  |       | 21<br>(20.8%)  | 10<br>(19.6%) |       |
|                                                                                          | Either, no preference                             | 0<br>(.%)     | 2<br>(2.6%)   | 2<br>(5.7%)   |       | 3<br>(3.0%)    | 1<br>(2.0%)   |       |
|                                                                                          | Leukoreduction ONLY                               | 19<br>(38.8%) | 17<br>(21.8%) | 12<br>(34.3%) |       | 33<br>(32.7%)  | 13<br>(25.5%) |       |
|                                                                                          | Other Strategy                                    | 3<br>(6.1%)   | 3<br>(3.8%)   | 0<br>(.%)     |       | 2<br>(2.0%)    | 3<br>(5.9%)   |       |
|                                                                                          |                                                   |               |               |               |       |                |               |       |
| Indicate which patients received CMV-seronegative blood products and/or leukoreductions. | All patients                                      | 26<br>(53.1%) | 28<br>(35.9%) | 22<br>(62.9%) | 0.068 | 46<br>(45.5%)  | 26<br>(51.0%) | 0.739 |
|                                                                                          | Only CMV D-/R-                                    | 9<br>(18.4%)  | 24<br>(30.8%) | 6<br>(17.1%)  |       | 23<br>(22.8%)  | 13<br>(25.5%) |       |
|                                                                                          | Other patient groups                              | 0<br>(.%)     | 5<br>(6.4%)   | 1<br>(2.9%)   |       | 4<br>(4.0%)    | 2<br>(3.9%)   |       |
|                                                                                          | CMV D-/R- and D+/R-                               | 14<br>(28.6%) | 21<br>(26.9%) | 6<br>(17.1%)  |       | 28<br>(27.7%)  | 10<br>(19.6%) |       |
|                                                                                          |                                                   |               |               |               |       |                |               |       |
| Did your center ever use adoptive immunotherapy in allogeneic transplant recipients?     | No                                                | 53<br>(93.0%) | 79<br>(98.8%) | 35<br>(94.6%) | 0.197 | 105<br>(97.2%) | 53<br>(94.6%) | 0.412 |
|                                                                                          | Yes                                               | 4<br>(7.0%)   | 1<br>(1.3%)   | 2<br>(5.4%)   |       | 3<br>(2.8%)    | 3<br>(5.4%)   |       |
|                                                                                          |                                                   |               |               |               |       |                |               |       |
| Indicate your center's primary strategy for using adoptive immunotherapy.                | Only after failure of preemptive therapy          | 3<br>(75.0%)  | 0<br>(.%)     | 1<br>(50.0%)  | 0.429 | 2<br>(66.7%)   | 1<br>(33.3%)  | 1     |
|                                                                                          | Used as preemptive therapy                        | 0<br>(.%)     | 1<br>(100.0%) | 1<br>(50.0%)  |       | 1<br>(33.3%)   | 1<br>(33.3%)  |       |
|                                                                                          | Used as prophylaxis                               | 1<br>(25.0%)  | 0<br>(.%)     | 0<br>(.%)     |       | 0<br>(.%)      | 1<br>(33.3%)  |       |
|                                                                                          |                                                   |               |               |               |       |                |               |       |
| Did your center use systemic antifungal prophylaxis in allogeneic transplant recipients? | No                                                | 6<br>(10.5%)  | 12<br>(15.0%) | 1<br>(2.7%)   | 0.129 | 9<br>(8.3%)    | 10<br>(17.9%) | 0.078 |
|                                                                                          | Yes                                               | 51<br>(89.5%) | 68<br>(85.0%) | 36<br>(97.3%) |       | 99<br>(91.7%)  | 46<br>(82.1%) |       |

Table S2: Comparisons by Patient Population and Center Size

|                                                                                    |                                        |               |               |               |       |               |               |       |
|------------------------------------------------------------------------------------|----------------------------------------|---------------|---------------|---------------|-------|---------------|---------------|-------|
| Indicate when your center initiated antifungal prophylaxis.                        | With conditioning regimen              | 36<br>(70.6%) | 34<br>(50.0%) | 27<br>(75.0%) | 0.048 | 66<br>(66.7%) | 25<br>(54.3%) | 0.329 |
|                                                                                    | At infusion of graft<br>(Day 0 +/- 1d) | 9<br>(17.7%)  | 26<br>(38.2%) | 7<br>(19.4%)  |       | 25<br>(25.3%) | 15<br>(32.6%) |       |
|                                                                                    | Other                                  | 6<br>(11.8%)  | 8<br>(11.8%)  | 2<br>(5.6%)   |       | 8<br>(8.1%)   | 6<br>(13.0%)  |       |
| Indicate the duration of antifungal prophylaxis used by your center.               | Treat until engraftment                | 11<br>(22.0%) | 17<br>(25.0%) | 7<br>(19.4%)  | 0.664 | 21<br>(21.2%) | 11<br>(24.4%) | 0.651 |
|                                                                                    | Treat until day 75-100                 | 26<br>(52.0%) | 28<br>(41.2%) | 20<br>(55.6%) |       | 52<br>(52.5%) | 20<br>(44.4%) |       |
|                                                                                    | Other                                  | 13<br>(26.0%) | 23<br>(33.8%) | 9<br>(25.0%)  |       | 26<br>(26.3%) | 14<br>(31.1%) |       |
| Indicate the primary drug used for systemic antifungal prophylaxis at your center. | Fluconazole                            | 42<br>(84.0%) | 53<br>(77.9%) | 29<br>(80.6%) | 0.886 | 81<br>(81.8%) | 34<br>(75.6%) | 0.6   |
|                                                                                    | Itraconazole                           | 5<br>(10.0%)  | 8<br>(11.8%)  | 18<br>(11.7%) |       | 11<br>(11.1%) | 7<br>(15.6%)  |       |
|                                                                                    | Other                                  | 3<br>(6.0%)   | 7<br>(10.3%)  | 12<br>(7.8%)  |       | 7<br>(7.1%)   | 4<br>(8.9%)   |       |
